# Supplementary material for: Sex differences in post cardiac arrest discharge locations
Source: PubMed Central journal article supplement — Resusc Plus. 2021 Dec 5;8:100185. doi: 10.1016/j.resplu.2021.100185 (PMC8654620; doi:10.1016/j.resplu.2021.100185), 2021-12-05
Supplement: mmc1.pdf [file mmc1.pdf]

## Supplementary

As a model sensitivity analysis, we used an alternative to the two-step approach presented in the paper. We ran a logistic regression including sex and all medically relevant covariates selected by the bidirectional selection, considering discharge location as the outcome of interest. The results of this analysis are consistent with those of the main model, and indicate that sex is associated with discharge location ( $P = 0.029$ ).

Table 1: Multivariable logistic regression of baseline factors (after bidirectional selection), sex, and their association with **discharge location**.

| Factors                             | Discharge |              |         |
|-------------------------------------|-----------|--------------|---------|
|                                     | OR*       | 95 % CI      | P value |
| Age                                 | 0.96      | [0.95, 0.98] | <0.001  |
| Other cardiac etiology <sup>†</sup> | 1.67      | [1.14, 2.44] | 0.009   |
| Catheterization                     | 1.69      | [1.21, 2.38] | 0.002   |
| CCI <sup>‡</sup>                    | 0.87      | [0.79, 0.96] | 0.006   |
| LOS <sup>§</sup>                    | 0.98      | [0.97, 0.99] | <0.001  |
| mRS <sup>  </sup>                   | 0.18      | [0.11, 0.30] | <0.001  |
| PCAC <sup>‡‡</sup>                  | 0.81      | [0.69, 0.95] | 0.008   |
| Witnessed <sup>**</sup>             | 1.43      | [1.02, 1.98] | 0.034   |
| Sex <sup>††</sup>                   | 0.71      | [0.52, 0.97] | 0.029   |

\*Odd Ratio

<sup>†</sup>Reference: Other etiologies

<sup>‡</sup>Charlson Comorbidity Index

<sup>§</sup>Length Of Stay

<sup>||</sup>modified Rankin Scale, Reference: 0 - 2

<sup>‡‡</sup>Pittsburgh Cardiac Arrest Category

<sup>\*\*</sup>Reference: Non witnessed

<sup>††</sup>Reference: Men
